# Supplementary material
Source: PubMed Central journal article supplement (PMC2519378)
Supplement: supp_190_16_5555__1.pdf [file supp_190_16_5555__1.pdf]

## Supplementary Fig 1

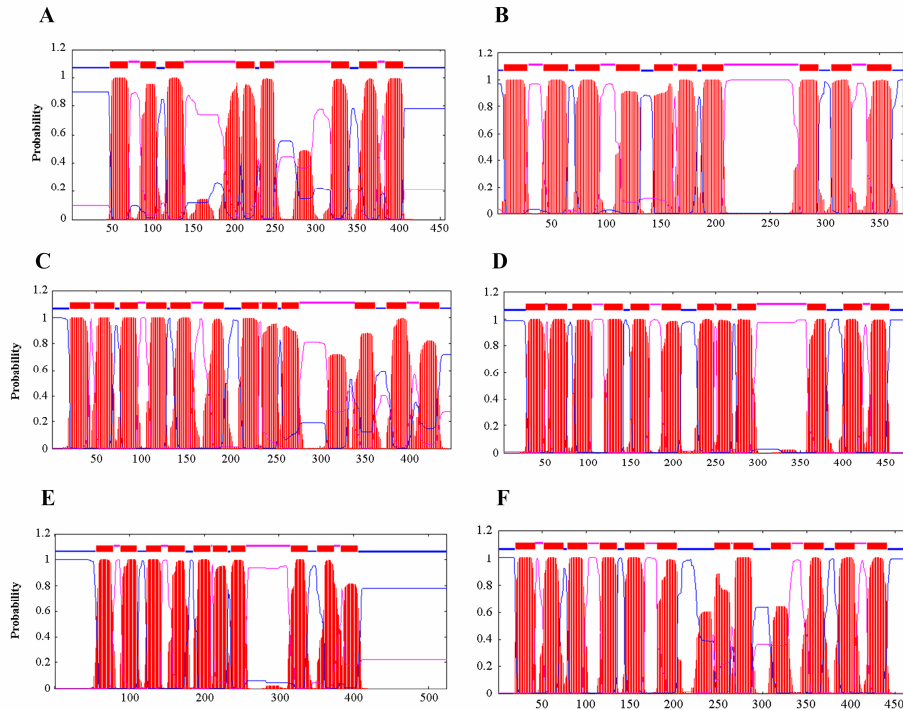

Hydropathy plots of actinomycete SEDS proteins.

Protein sequences were analysed using TMHMM version 2.0

(<http://www.cbs.dtu.dk/services/TMHMM-2.0/>). (A) FtsW<sub>Sc</sub>; (B) SCO2607 (Sfr);

(C) SCO5302; (D) RodA<sub>Sc</sub>; (E) FtsW<sub>Mt</sub>; (F) RodA<sub>Mt</sub>. The horizontal bars for each

plot represent the topological predictions for a given protein: thick red bars are

transmembrane helices, blue lines are cytoplasmic loops and pink lines are

extracytoplasmic loops.

Supplementary Fig 2

```

FtsWSc 1 -----MPGSPQSRTRGPFVQRTVKRP-AAPGPPHDNGVLRLLYHRLRRRAW
FtsWMt 1 MLTRLLRRGTSDDTSGSQRGAEPVEGQRTGPEEASNPGSARPRTRFGAWL
      *:.: :. . . * :. * . : * * * :

FtsWSc 44 DRPLTAYLIFGGSALITVLGLVMVYSASQITALQLSLPGSYFFRKQALA
FtsWMt 51 GRPMTSFHLIIAVAALLTTLGLIMVLSASAVRSYDDSGSAWVIFGKQVIW
      .*:*:*:*:*: .*:*:*:*:*: * * * : : . . . : * * * . *

FtsWSc 94 ALIGAGLLVAAMKMPVKLHRLALYPILAGAVFIMLLVQVPVIGVAVNGNQ
FtsWMt 101 TLVGLIGGYVCLRMSVRFMRRIAFSGFAITIVMLVLVLPVIGKEANGSR
      :*: * . . . : * . * : : * : . . . : * * * * * * . * * . :

FtsWSc 144 NWISLGGSFQIQPSEFGKLALVLWGADLLARKHDKKLLTQWKHMLVPLVP
FtsWMt 151 GWFVVAG-FSMQPSLAKMAFAIWGAHLAARRMER--ASIREMLIPLVP
      .*: . * * . * * * : . * : . * * * * * * : : : . : . * * : * * *

FtsWSc 194 AAFMLLGLMIGGDMGTAIILTAILFGLLWLAGAPTRLFAGVLSIALLG
FtsWMt 198 AAVVALALI VAQPDLGQTVSMGIILLGLLWYAGLPLRVFLSSLAAVVVSA
      * * . : * * * : * : * : : * * : * * * * * * * * * . * : . : .

FtsWSc 244 FILIKTSANRMRALNCLGATDPGPGDCSQQAVHGIYALASGGLFGSGLGA
FtsWMt 248 AILAVSAGYRSDRVRSWLNPENDPQDSGYQARQAKFALAQQGGIFGDGLGQ
      * * : . . * * : . . : . * * * : * * : . : * * * * * * * * *

FtsWSc 294 SVEKWGQLP[E]AHTDFIFAVTGEELGLAGTLSVLALFAALGYAGIRVAGRT
FtsWMt 298 GVAKWNYLP[N]AHNDFIFAIIGEELGVGALGLGLGLFAYTGMRIASRS
      . * * * . * * : * * * * * * * : * * * * * * * : . * : * * * * * :

FtsWSc 344 EDPFVRYAAGGVTTWITAQAVINIGAVLGLLP IAGVPIP[L]FSYGG SALLP
FtsWMt 348 ADPFLRLLTATTLWVLGQAFINIGYVIGLLPVTGLQIP[L]ISAGGTSTAA
      * * * : * : . * * : . * * * * * * * : * * * * * : * * * : * * * : .

FtsWSc 394 TMFAIGLLIFARDEPGARAAL-----
FtsWMt 398 TSLIIGIIANAARHEPEVAVALRAGRDDKVNRLRLPLPEPYLPPRLFAF
      * : * * : * * * * * * * * * * * * * * * * * * * * * * * * * * *

      [TVSYTHL--HHH
FtsWSc 416 -----ALRQPRFGKRGAGGPAAKRS-----PGSWNTMR--RAS
FtsWMt 448 RDRKRANPQPAQTQAPARKTPRTAPGQPARQMGLPPRPQSPRTADPPVRS
      * * * * * * * * * * * * * * * * * * * * * * * * * * * * * * *

      R]
FtsWSc 449 AARSSGER-----
FtsWMt 498 VHGAGQRYAGQRTRRRVRALEGQRYG
      . : . : * : *
  
```

Amino acid alignment between FtsW<sub>Sc</sub> and FtsW<sub>Mt</sub>.

An asterisk below the alignment indicates an identical amino acid at that position, a colon indicates a position of a conserved substitution, and a dot indicates a semi-conserved substitution. The positions of the two conserved proline residues implicated as being important for interactions between FtsW<sub>Mt</sub> and FtsI<sub>Mt</sub> are boxed. The C-terminal amino acid sequence of the truncated FtsW of DSCO2085-5 is indicated in square brackets above the polypeptide sequence replaced in this mutant.

Supplementary Fig 3

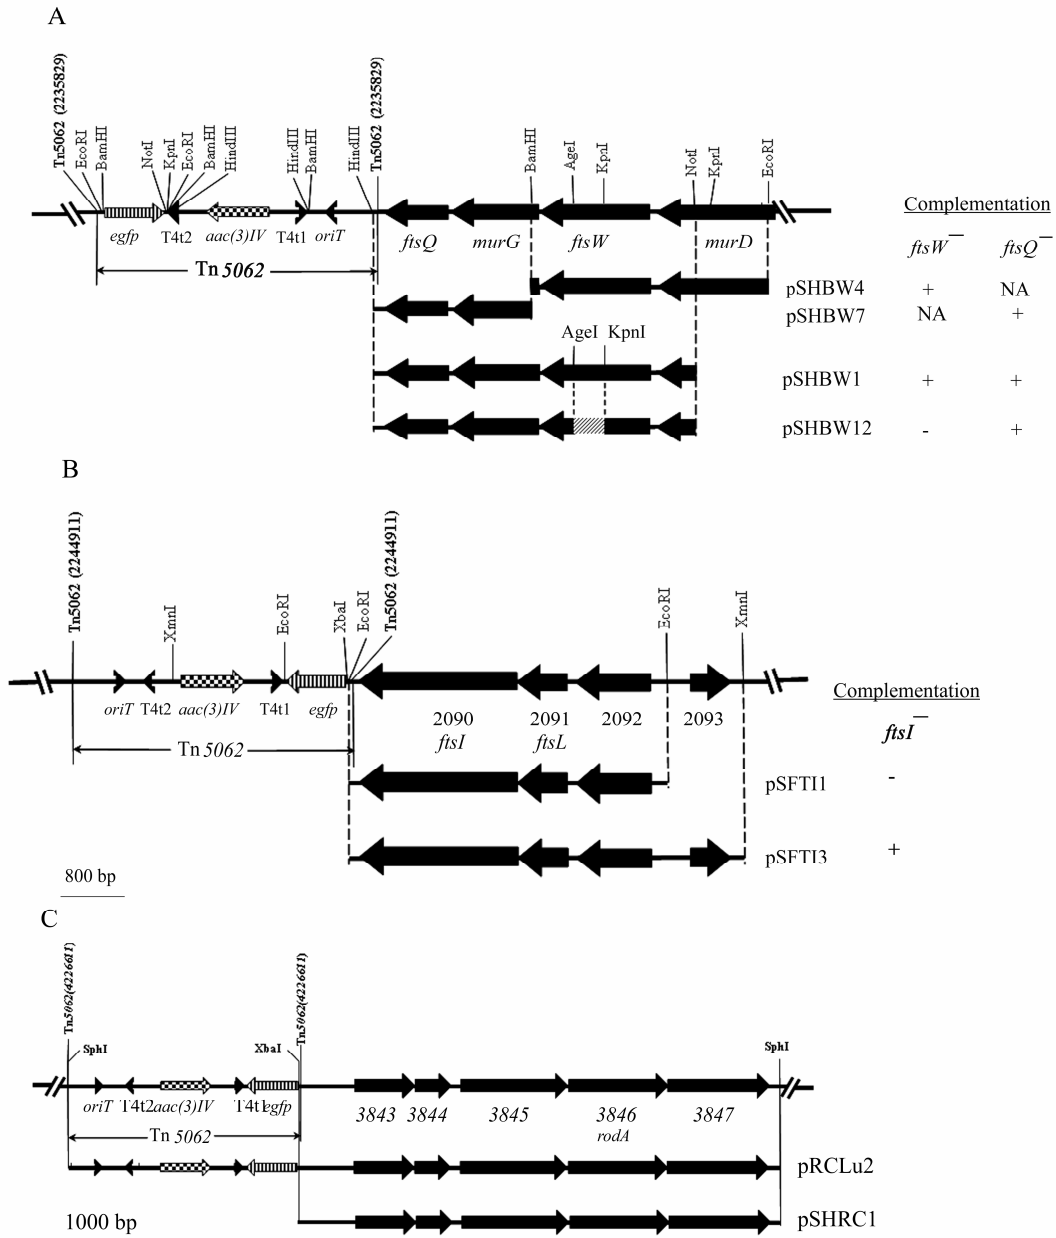

Maps of the relevant regions of cosmids derived from SC4A10 used to derive DNA fragments used for genetic complementation.

(A) SC4A10 containing a Tn5062 insertion at position 15834 (equivalent to position 2235829 in the genome) and the restriction fragments derived from this used to test complementation of *ftsW* and *ftsQ* mutants.

(B) SC4A10 containing a Tn5062 insertion at position 24916 (equivalent to position 2244911 in the genome) and the restriction fragments derived from this used to test complementation of the *ftsI* mutant.

(C) SCH69 containing a Tn5062 insertion as position 16172 (equivalent to position 4226611 in the genome) and the restriction fragments derived from this used to construct the integrative plasmid pSHRC1.
